# Supplementary material for: Encapsulation of luminol and Co2+ within a metal–organic framework for enhanced chemiluminescence and imaging of inflammation
Source: Royal Society of Chemistry journal article supplement (doi:10.1039/d4tc01826e), 2024-01-01
Supplement: d4tc01826e1.pdf [file d4tc01826e1.pdf]

## Supporting Information

### **Encapsulation of Luminol and Co<sup>2+</sup> within a Metal-Organic Framework for Enhanced Chemiluminescence and Imaging of Inflammation**

Hongxu Chen<sup>a</sup>, Danna Zou<sup>a</sup>, Wenqian Cao<sup>a</sup>, Yuanjing Cui<sup>\*a</sup>, Guodong Qian<sup>\*a</sup>, Zhengluan Liao<sup>\*b</sup>

a. State Key Laboratory of Silicon and Advanced Semiconductor Materials, ZJU-Hangzhou Global Scientific and Technological Innovation Center, School of Materials Science and Engineering, Zhejiang University, Hangzhou 310027, China.

E-mail: cuiyj@zju.edu.cn (Y. J. Cui), gdqian@zju.edu.cn (G. D. Qian)

b. School of Clinical Medical, Hangzhou Medical College, Hangzhou 310053, China.

E-mail: k922185@zju.edu.cn (Z. L. Liao)

## Experimental Section/Methods

### Characterization

Powder X-ray diffraction (PXRD) data were collected in the  $2\theta = 3^\circ\text{--}40^\circ$  range on a PANalytical X'Pert Pro X-ray diffractometer using Cu-K $\alpha$  ( $\lambda = 1.542 \text{ \AA}$ ) beam at room temperature. The particle sizes and morphologies were determined by a Hitachi S4800 Scanning Electron Microscope (SEM). The Hitachi U-4100 UV/vis spectrophotometer measured UV/vis absorption spectra. AXIS Supra X-ray photoelectron spectroscopy (XPS) characterized the chelation of Co<sup>2+</sup> at free pyridine sites in UiO-67-bpydc structures. The BPCL Weak Chemiluminescence Measuring Instrument (BPCL-1-T) was used for chemiluminescence testing. ICP (Inductively Coupled Plasma) was performed on the Optima 5300DV. Fourier-transform infrared (FT-IR) spectra were collected by a Nicolet iS50 FT-IR spectrometer. The specific surface areas were measured by Brunauer Emmett Teller (BET) on a Micrometrics ASAP 2010 system. The samples were degassed at 160 °C for 2 hours before the measurement and the N<sub>2</sub> adsorption-desorption isotherms were obtained at 77K. Thermogravimetric analyses (TGA) were conducted on a Netsch TGA 209 F3 thermogravimeter with a heating rate of 10 K min<sup>-1</sup> in N<sub>2</sub> atmosphere. The CL images were taken by a PerkinElmer IVIS Spectrum.

### In Vitro Cytotoxicity

Hela cells were separately seeded into 96-well plates at a density of  $1 \times 10^4$  per well. After overnight culture, cells were treated with different doses of UiO-67-bpydc $\Rightarrow$ Co+Lu for 6 h. Then, the cell viability was determined by using the MTT assay.

### Animals

All experimental animal protocols were approved by Experimental Animal Welfare Ethics Review Committee of the Zhejiang University (Application number: ZJU20240060). BALB/c mice (18-22 g) were obtained from the Hangzhou Medical College. Animals were housed in standard cages and kept under a 12 h light-dark cycle in an air-conditioned facility with ad libitum access to food and water. Animals were acclimatized to the new laboratory surroundings for at least one week before further experimentation.

Skin inflammation was induced in BALB/c mice by cutting back skin. At 48 h after induction of inflammation, each mouse was administered with 0.5 mg UiO-67-bpydc $\Rightarrow$ Co+Lu, while the same volume of PBS was injected to mice in the control group. At the predefined time points, luminescence images were detected by an IVIS Spectrum system, with an exposure time of 1 min.

**Table S1.** The pore volume of UiO-67-bpydc, UiO-67-bpydc $\supset$ Co and UiO-67-bpydc $\supset$ Co + Lu.

| Sample                              | UiO-67-bpydc | UiO-67-bpydc $\supset$ Co | UiO-67-bpydc $\supset$ Co+Lu |
|-------------------------------------|--------------|---------------------------|------------------------------|
| Pore volume<br>[cm <sup>3</sup> /g] | 0.27         | 0.11                      | 0.08                         |

**Table S2.** ICP test result of UiO-67-bpydc $\supset$ Co+Lu.

| Sample                       | Zr <sup>2+</sup><br>[ppm] | Co <sup>2+</sup><br>[ppm] | Molar ratio: Zr:Co |
|------------------------------|---------------------------|---------------------------|--------------------|
| UiO-67-bpydc $\supset$ Co+Lu | 13.79                     | 3.64                      | 3.79:1.00          |

**Table S3.** Comparison of the H<sub>2</sub>O<sub>2</sub> sensing ability of UiO-67-bpydc $\supset$ Co+Lu with the recently reported luminol-H<sub>2</sub>O<sub>2</sub> systems.

| Materials                          | Linear range [μM] | LOD [μM] | Ref.      |
|------------------------------------|-------------------|----------|-----------|
| UiO-67-bpydc $\supset$ Co+Lu       | 10-100            | 0.52     | this work |
| Hemin@HKUST-1                      | 7.5-750           | 2.0      | 1         |
| GO                                 | 100-2000          | 85       | 2         |
| CuO                                | 5-60              | 2.9      | 3         |
| FeCo <sub>2</sub> S <sub>4</sub> . | 0-10              | 0.5      | 4         |
| DNAzyme                            | 100-1000          | 50       | 5         |
| Hb                                 | 400-600           | 130      | 6         |

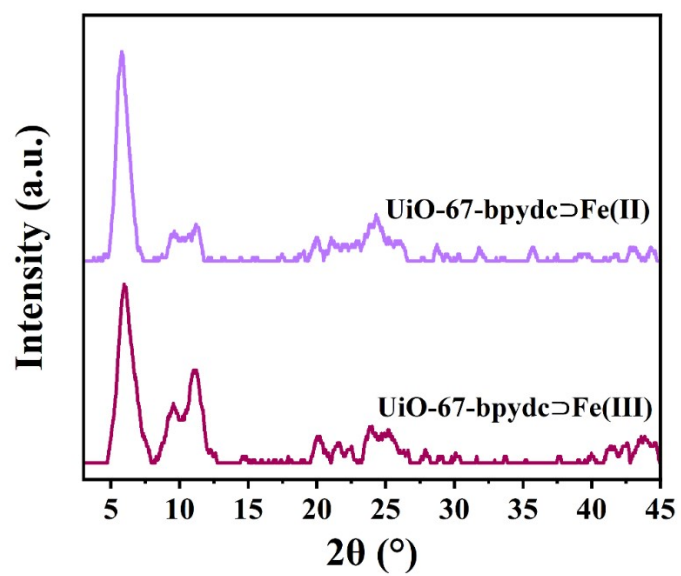

**Fig. S1** PXRD patterns of UiO-67-bpydc $\supset$ Fe(II) and UiO-67-bpydc $\supset$ Fe(III).

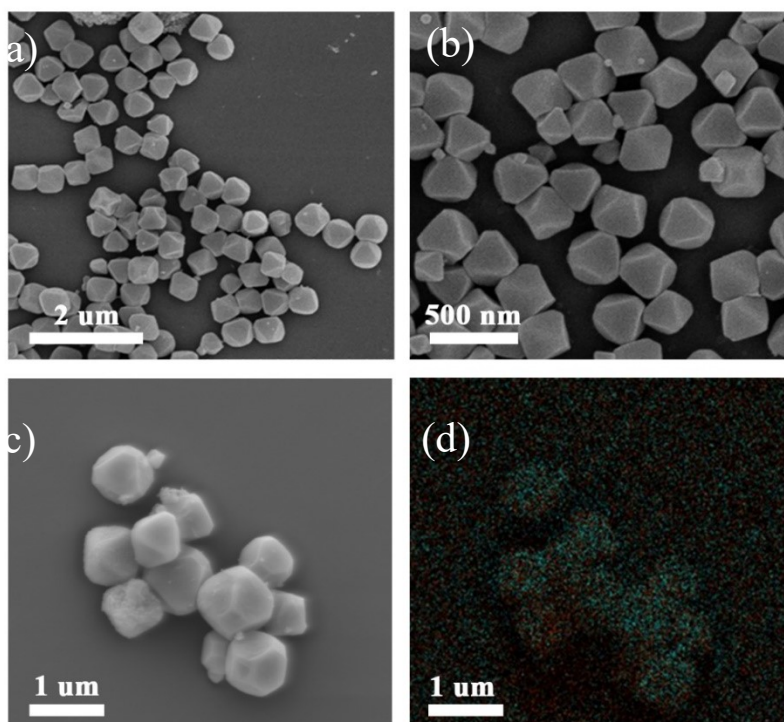

**Fig. S2** SEM images of (a) UiO-67-bpydc, (b) UiO-67-bpydc $\supset$ Co+Lu and (c) UiO-67-bpydc $\supset$ Fe(III). (d) Element mapping image of UiO-67-bpydc $\supset$ Fe(III).

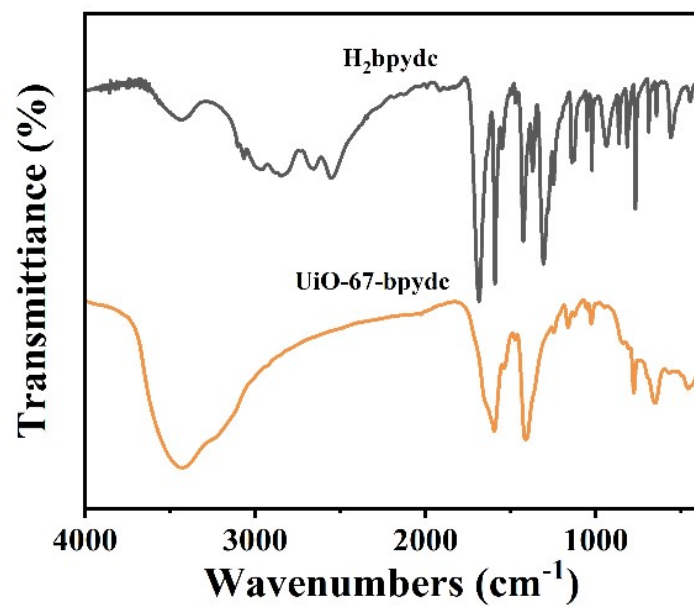

Fig. S3 FT-IR spectra of H<sub>2</sub>bpydc and UiO-67-bpydc.

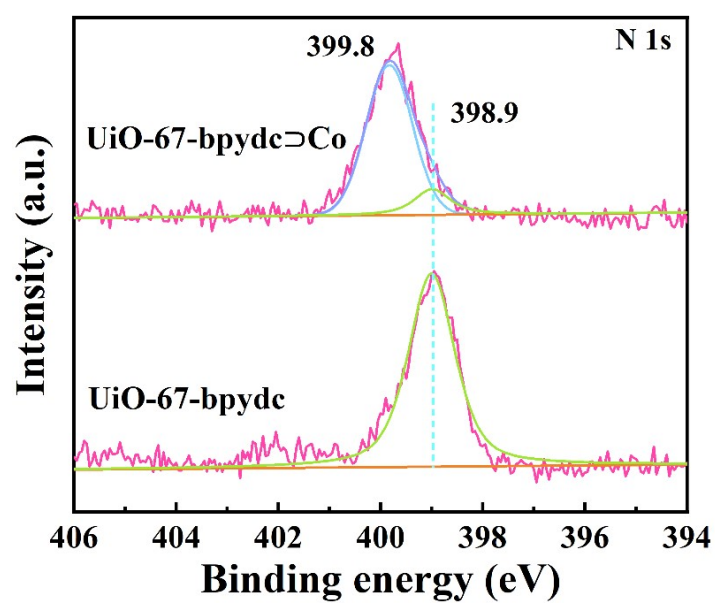

Fig. S4 N 1s XPS spectra of UiO-67-bpydc and UiO-67-bpydc⊃Co.

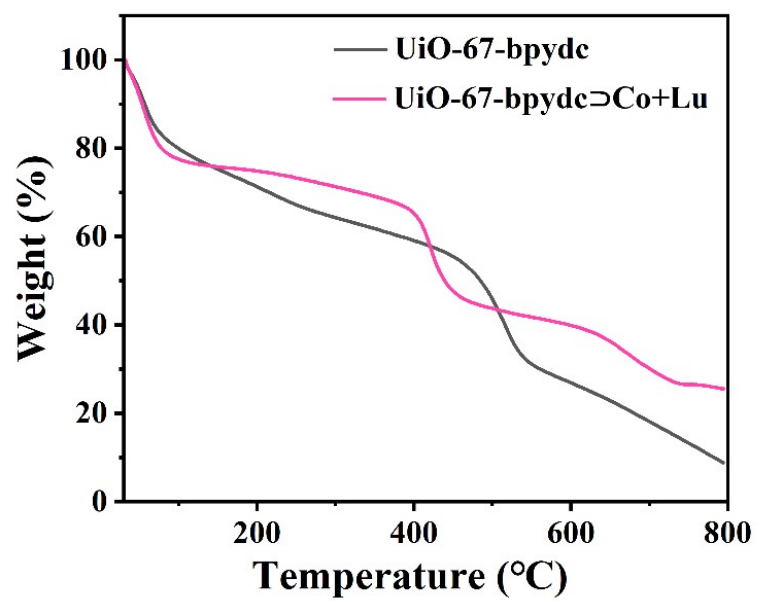

Fig. S5 The TGA curves of UiO-67-bpydc and UiO-67-bpydc⊃Co+Lu.

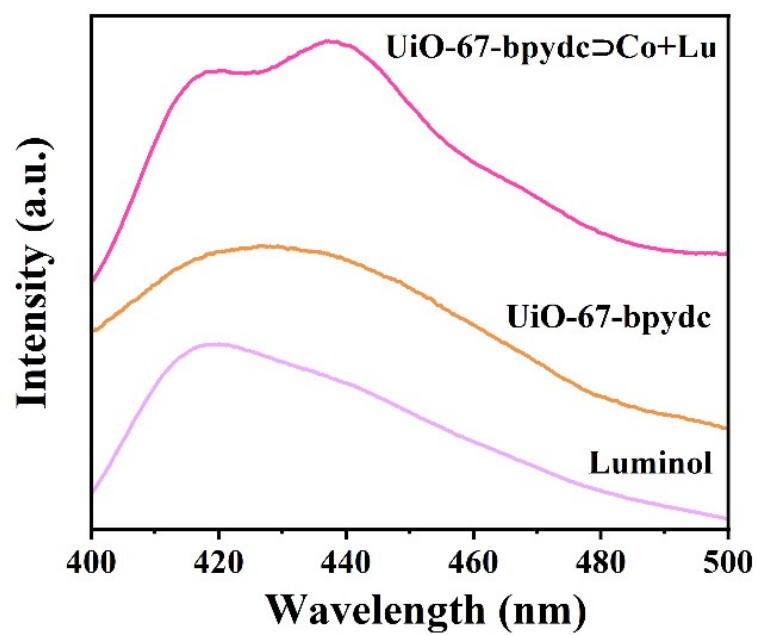

Fig. S6 Emission spectra of UiO-67-bpydc, UiO-67-bpydc⊃Co and UiO-67-bpydc⊃Co+Lu.

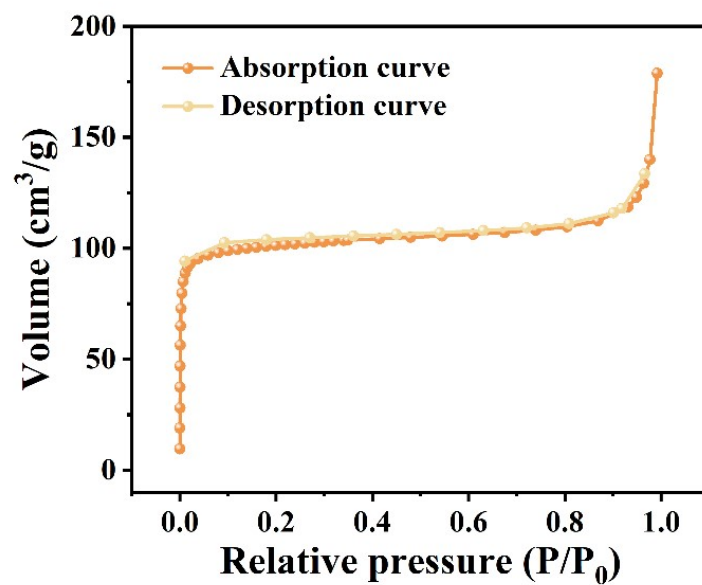

Fig. S7 The nitrogen sorption isotherm of UiO-67-bpydc.

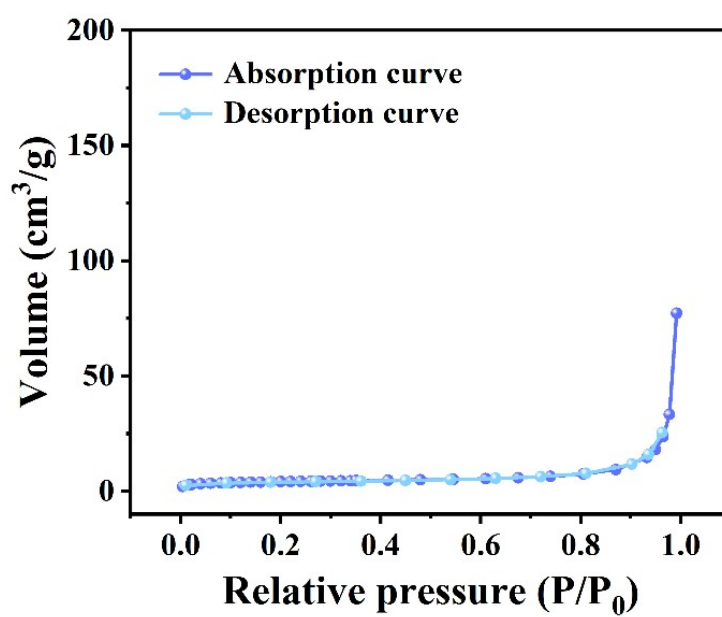

Fig. S8 The nitrogen sorption isotherm of UiO-67-bpydc@Co.

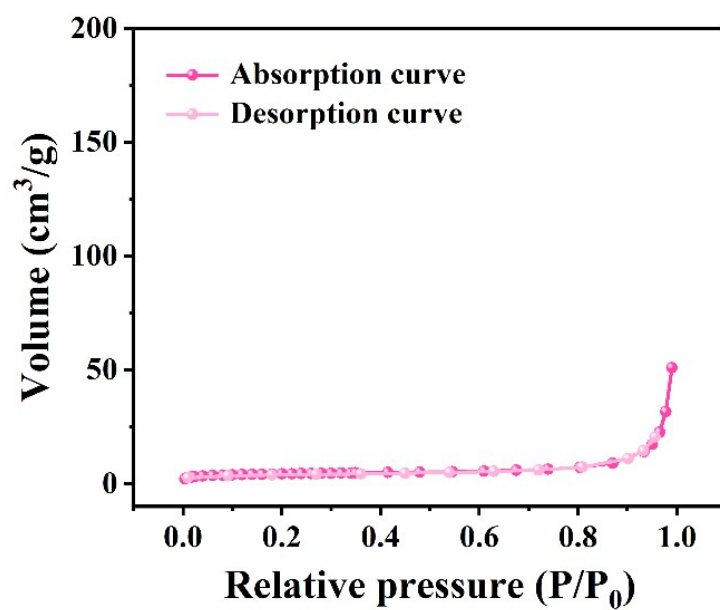

Fig. S9 The nitrogen sorption isotherm of UiO-67-bpydc⊃Co+Lu.

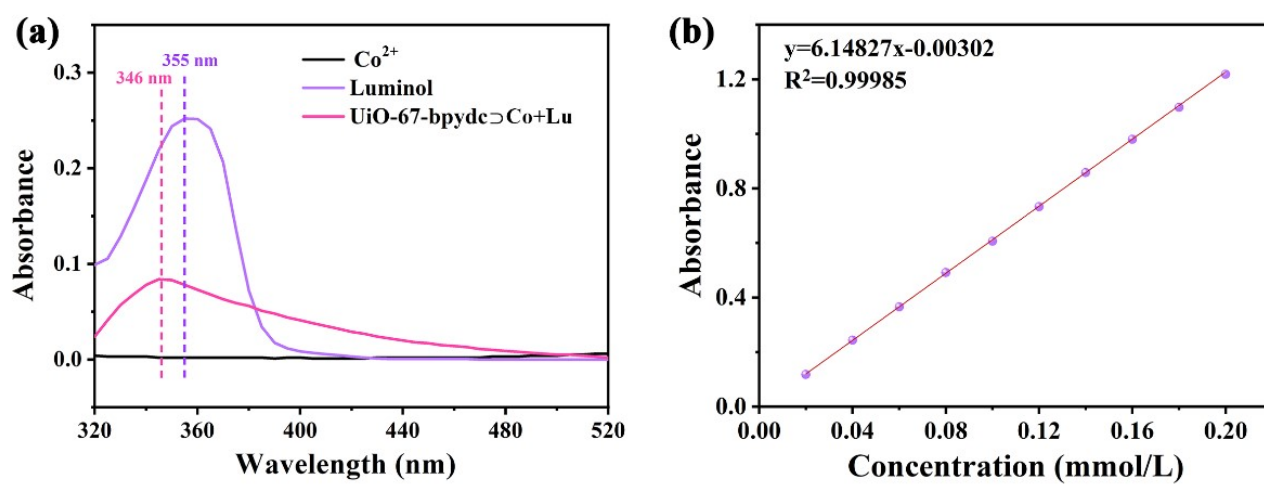

Fig. S10 a) UV absorption curves of UiO-67-bpydc⊃Co + Lu. b) UV absorption intensity and concentration standard curve of luminol at 355 nm.



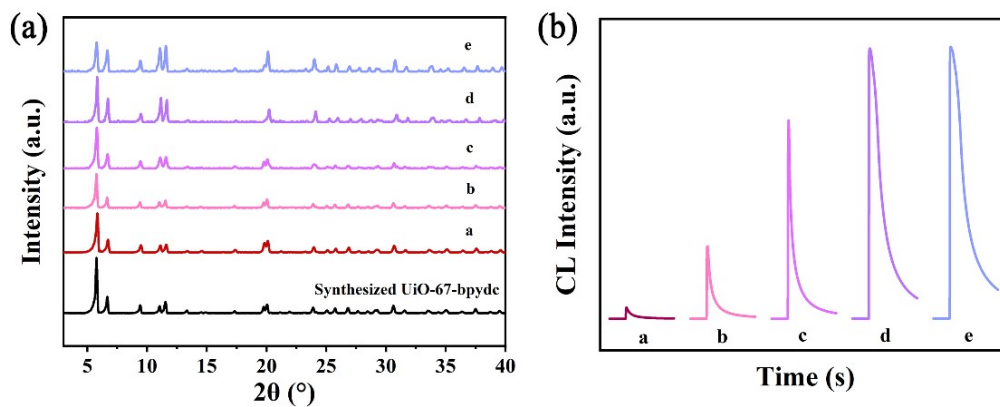

**Fig. S11** a) XRD pattern and b) CL spectra of UiO-67-bpydc/Co by introducing  $\text{Co}^{2+}$  with different initial concentrations, in which the a-e represent concentrations of 0.01 (a), 0.05 (b), 0.1 (c), 0.2 (d) and 0.4 mM (e), respectively.

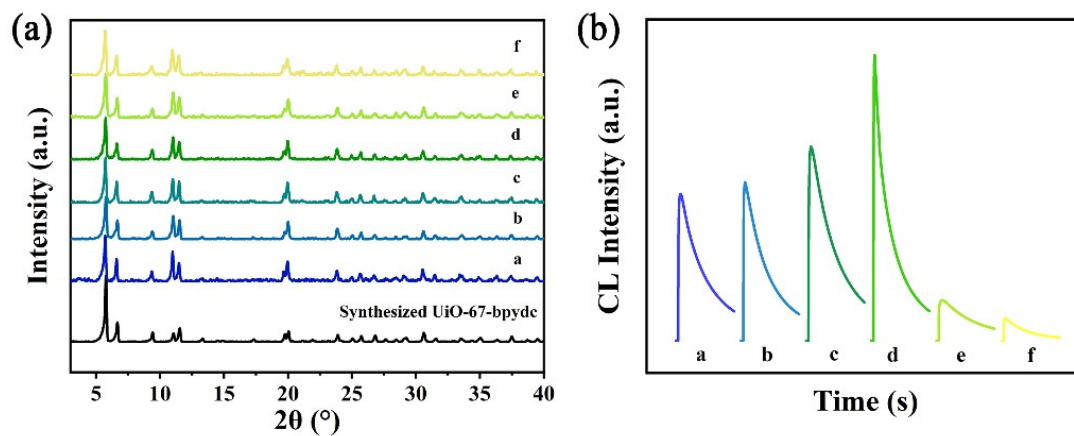

**Fig. S12** a) XRD spectrum and b) CL spectra of UiO-67-bpydc/Co+Lu by introducing different initial amounts of luminol, in which the a-f represent concentrations of 2.5 (a), 5 (b), 7.5 (c), 10 (d), 12.5 (e) and 15 (f) mg/mL.

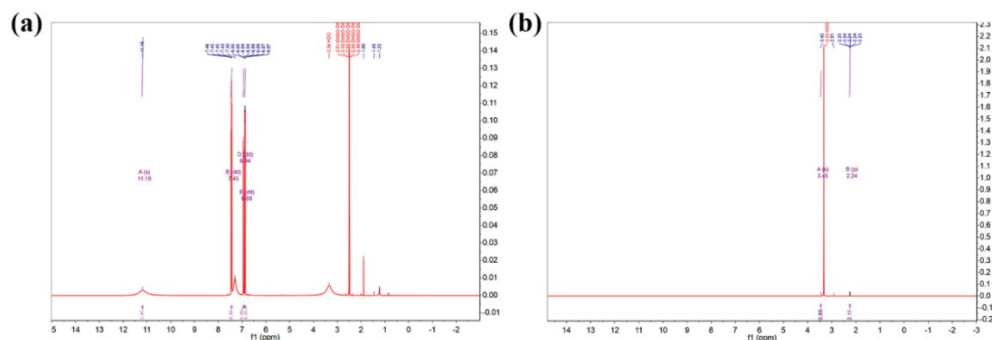

**Fig. S13** The  $^1\text{H}$  NMR spectra of a) luminol and b) UiO-67-bpydc/Co+Lu supernatant after 6 h immersion in PBS (pH 7.4).

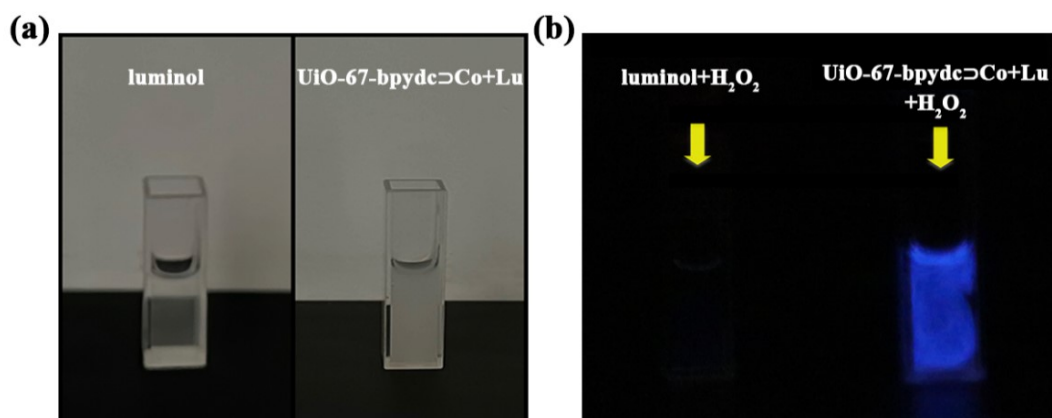

**Fig. S14** CL photos: a) luminol and UiO-67-bpydc=Co+Lu, b) luminol and UiO-67-bpydc=Co+Lu reacted with  $H_2O_2$  at the same concentration.

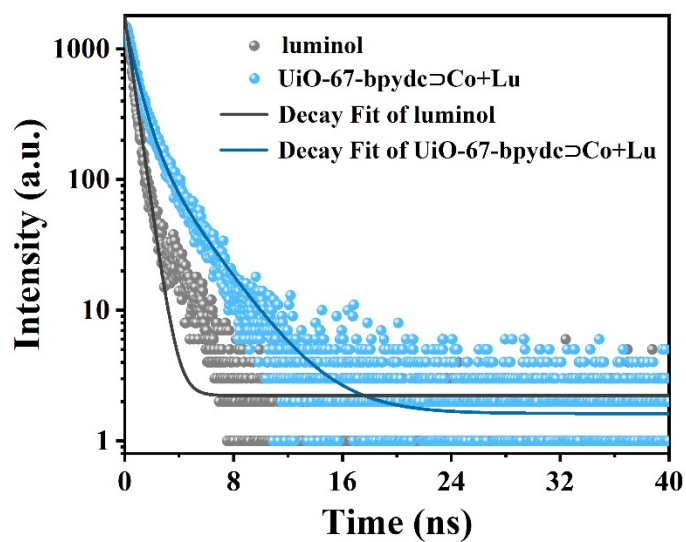

**Fig. S15** Decay spectra of 420 nm emission in UiO-67-bpydc=Co+Lu excited by 375 nm laser.

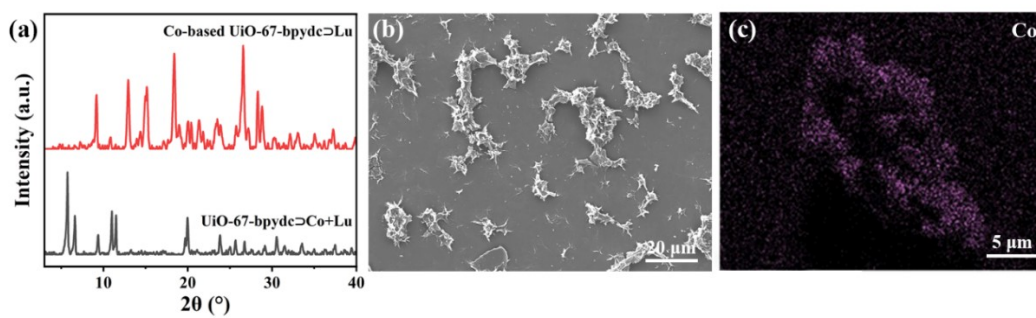

**Fig. S16** (a) PXRD patterns of Co-based UiO-67-bpydc=Lu and UiO-67-bpydc=Co+Lu. (b) SEM image of Co-based UiO-67-bpydc=Lu. (c) Element mapping image of Co-based UiO-67-bpydc=Lu.

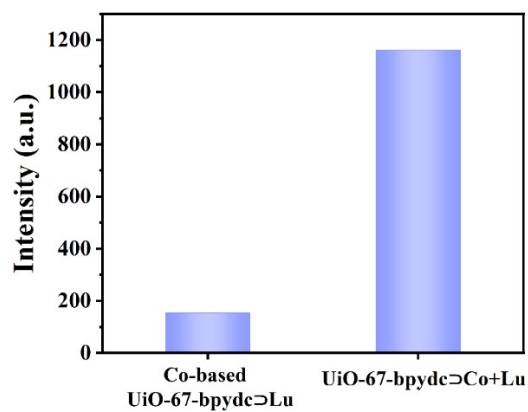

**Fig. S17** Chemiluminescence intensity of Co-based UiO-67-bpydc⊃Lu and UiO-67-bpydc⊃Co+Lu.

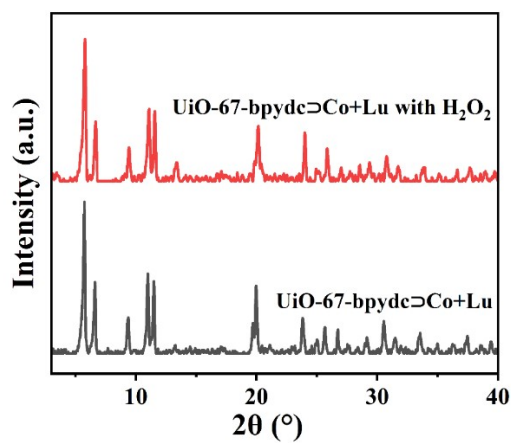

**Fig. S18** PXRD patterns of UiO-67-bpydc⊃Co+Lu before and after H<sub>2</sub>O<sub>2</sub> sensing.

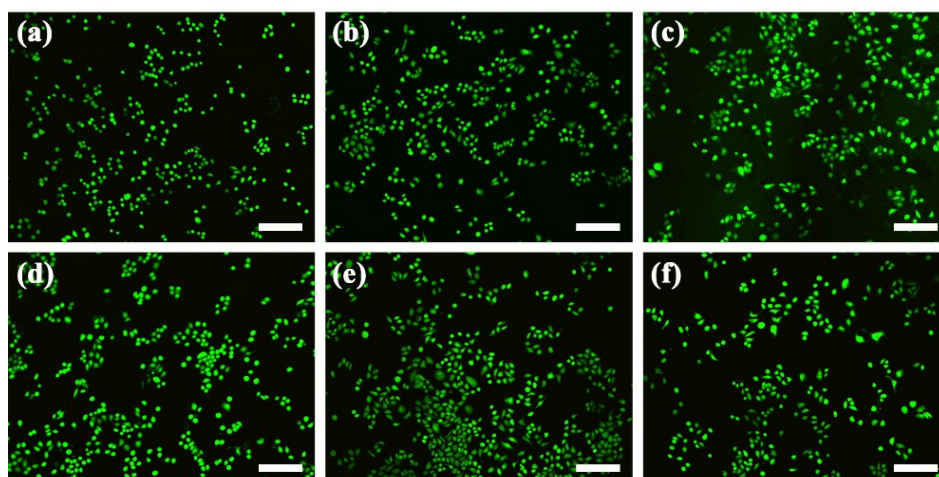

**Fig. S19** The CLSM images of HeLa cells cultured with different doses of UiO-67-bpydc⊃Co+Lu a) 0 μg/mL, b) 20 μg/mL, c) 40 μg/mL, d) 60 μg/mL, e) 80 μg/mL and f) 100 μg/mL, respectively. Scale bar = 200 μm.

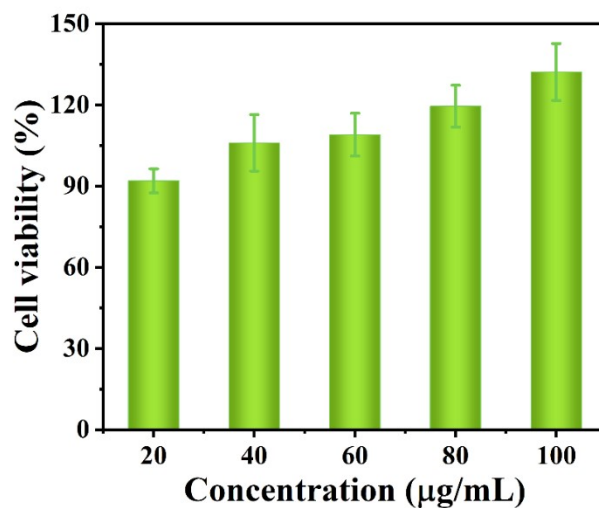

**Fig. S20** The cell viability of HeLa cells after treated with UiO-67-bpydc@Co+Lu.

## References

- 1 F. Luo, Y. Lin, L. Zheng, X. Lin, Y. Chi, *ACS Appl. Mater. Interfaces.*, 2015, **7**, 11322-11329.
- 2 M. Hao,; N. Liu, Z. Ma. *Analyst.*, 2013, **138**, 4393-4397.
- 3 W. Chen, L. Hong, A. L. Liu, J. Q. Liu, X. H. Lin, X. H. Xia, *Talanta*, 2012, **99**, 643-648.
- 4 Y. Lu, X. Zhang, Y. Huang, *Sensor. Actuat. B-chem.*, 2023, **390**, 134003 .
- 5 W. Chen, B. Li, C. Xu, L. Wang, *Biosens.Bioelectron.*, 2009, **24**, 2534-2540.
- 6 B. X. Li, Z. J. Zhang, L. X. Zhao, *Anal. Chim. Acta*, 2001, **445**, 161–167.
